# Supplementary material for: Trends in heat and cold wave risks for the Italian Trentino Alto-Adige region from 1980 to 2018
Source: Copernicus journal article supplement (doi:10.5194/nhess-2022-241), 2022-09-27
Supplement: Supplementary file 1 [file nhess-2022-241-supplement.pdf]

## Supplementary Material

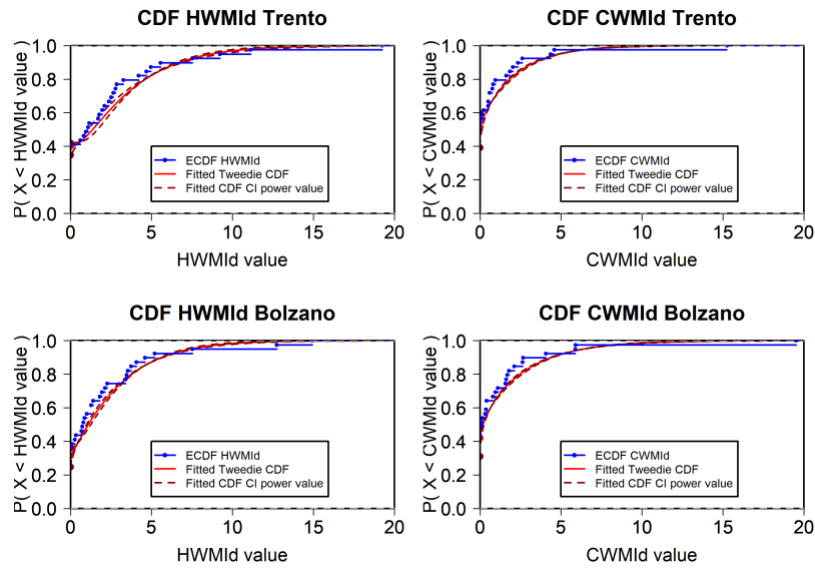

Figure S - 1: Cumulative distribution functions for both HWMId / CWMId at the location of the cities of Bolzano and Trento

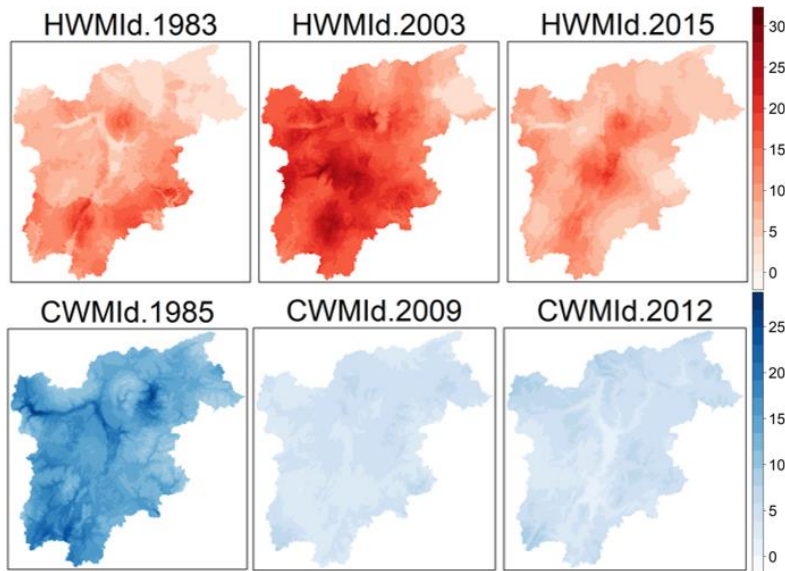

Figure S - 2: Regional Heat wave Magnitude Index daily and Cold Wave Magnitude index daily maps for single years among the highest regional average on record (1980-2018)

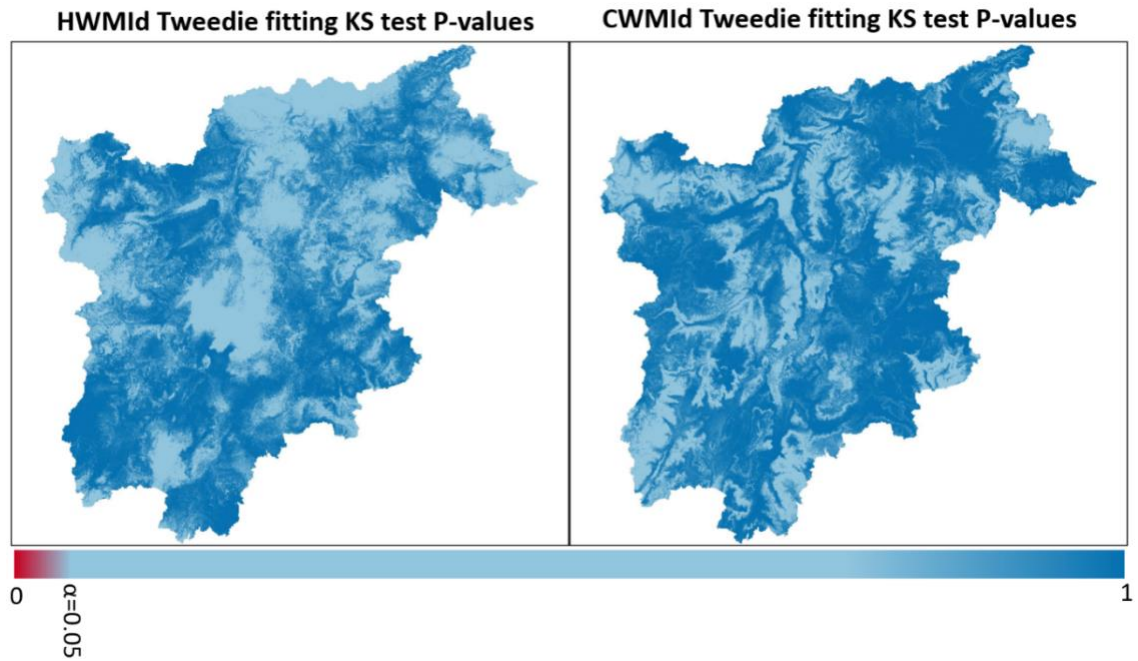

Figure S - 3: KS test P-values for the Tweedie distribution fitting of HWMId and CWMId

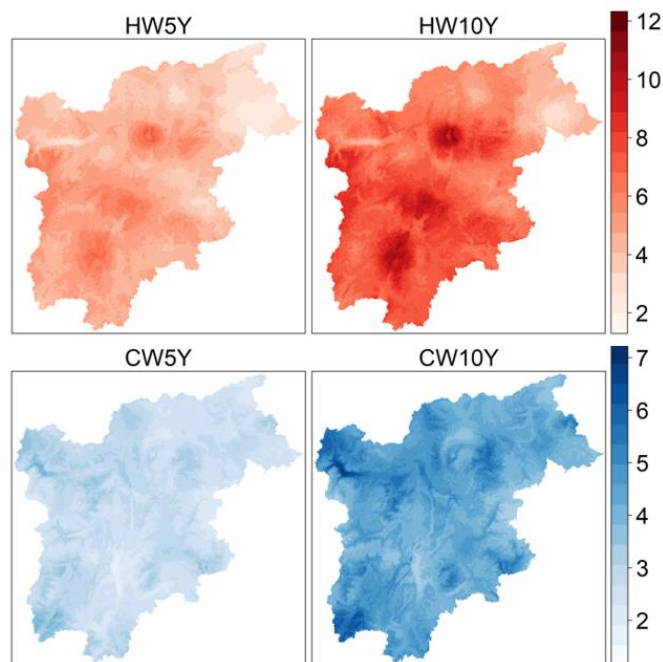

Figure S - 4: Heat wave and cold wave return levels corresponding to T=5years and T=10years

## Trends of heat waves and cold waves, robust linear model and significance

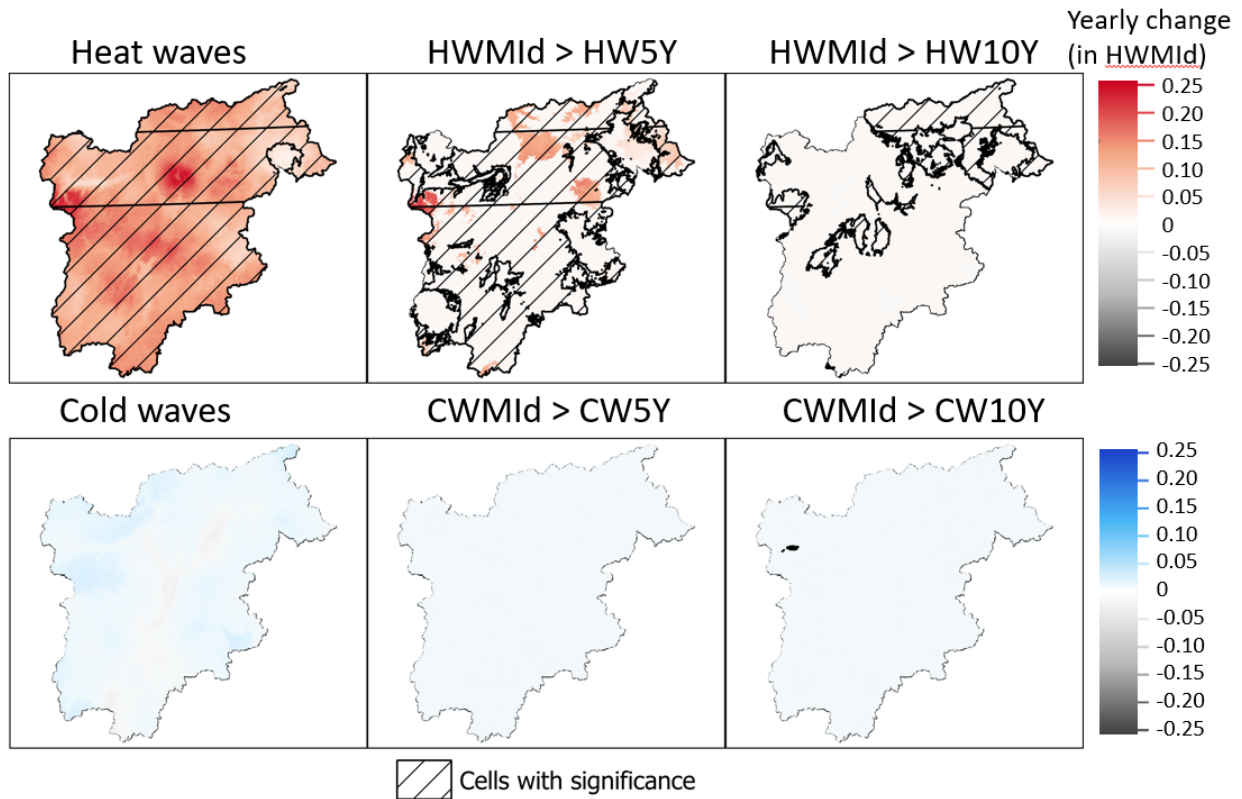

Figure S - 5: Trends in heat waves (HW) and cold waves (CW) using the robust linear model based on yearly HWMId and CWMId magnitudes from 1980 to 2018

Table T - 1: Trends of percentage of population exposed

| model         | Mann-Kendall significance | Mann-Kendall $\tau$ | Sen's slope | linear model significance | linear model slope |
|---------------|---------------------------|---------------------|-------------|---------------------------|--------------------|
| HWMId > HW5Y  | ***                       | 0.35                | 0.05        | ***                       | 1.33               |
| HWMId > HW10Y | ***                       | 0.31                | 0           | insignificant             | 0.48               |
| CWMId > CW5Y  | insignificant             | -0.10               | 0           | insignificant             | -0.18              |
| CWMId > CW10Y | insignificant             | 0.01                | 0           | insignificant             | -0.36              |

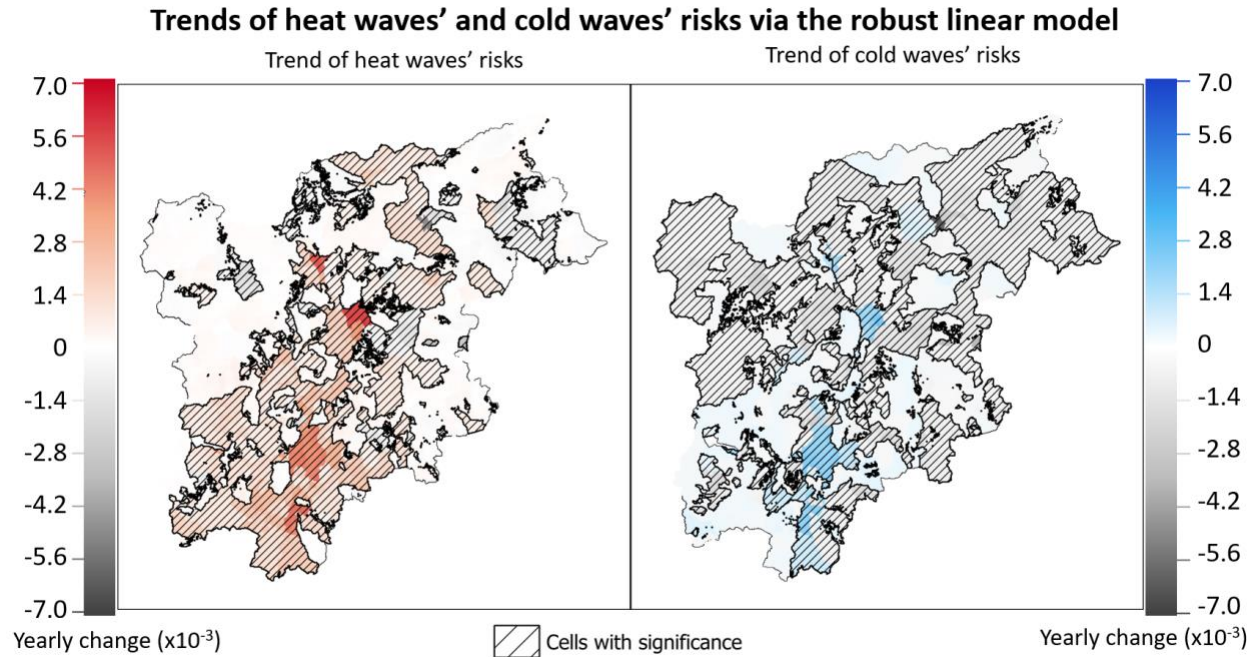

Figure S - 6: Trends of heat waves and cold waves risks via the robust linear model.

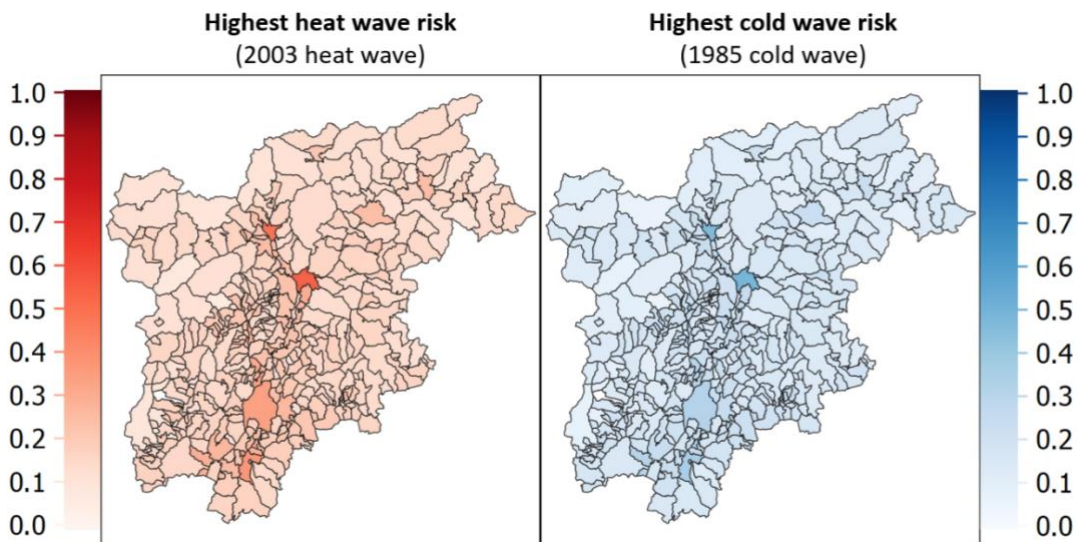

Figure S - 7: highest risks on record for heat waves and cold waves
